# Supplementary material for: Age-adjusted high-dose chemotherapy and autologous stem cell transplant in elderly and fit primary CNS lymphoma patients
Source: BMC Cancer. 2019 Mar 29;19:287. doi: 10.1186/s12885-019-5473-z (PMC6440161; doi:10.1186/s12885-019-5473-z)
Supplement: Supplementary file 1 — Table S1. List of study sites and ethics committees (PDF 9 kb) [file 12885_2019_5473_MOESM1_ESM.pdf]

**MARTA Trial:**  
**DRKS-No. 00011932**  
**EudraCT-Number: 2016-001628-72**  
**Sites and Ethic-Committees**

|   | <b>Site of principal coordinating investigator</b>                                                                                                                               |                                                                                                           | <b>Central ethics committee</b>                                                                                                                      |
|---|----------------------------------------------------------------------------------------------------------------------------------------------------------------------------------|-----------------------------------------------------------------------------------------------------------|------------------------------------------------------------------------------------------------------------------------------------------------------|
| 1 | Universitätsklinikum Freiburg<br>Medizinische Klinik I<br>Hämatologie/Onkologie u.<br>Stammzelltransplantation<br>Hugstetter Str. 55<br>79106 Freiburg                           | Coordinating principal investigator<br>Dr. Elisabeth Schorb:<br>Delegate<br>Prof. Dr. Jürgen Finke        | Ethik-Kommission<br>der Albert-Ludwigs-Universität<br>Freiburg<br>Engelberger Straße 21<br>79106 Freiburg                                            |
|   | <b>Participating sites</b>                                                                                                                                                       | <b>Investigators / Delegates</b>                                                                          | <b>Local ethics committees:</b>                                                                                                                      |
| 2 | Klinikum Augsburg<br>II. Medizinische Klinik<br>Cancer Center Augsburg<br>Stenglinstr.2<br>86156 Augsburg                                                                        | Investigators:<br>PD Dr. Andreas Rank<br>PD Dr. Boris Kubuschok                                           | Ethik-Kommission der Ludwig-<br>Maximilians Universität München<br>Pettenkoferstr. 8a<br>80336 München                                               |
| 3 | Universitätsklinikum Essen<br>Klinik für Hämatologie<br>Hufelandstraße 55<br>45122 Essen                                                                                         | Investigators:<br>Prof. Dr. Alexander Röth<br>PD Dr. Andreas Hüttmann                                     | Ethik-Kommission der Med. Fakultät<br>der Universität Duisburg-Essen<br>Jakobs Universitätsklinikum Essen<br>Robert-Koch-Str. 9-11<br>45122 Essen    |
| 4 | Klinikum der Johann-Wolfgang-<br>Goethe-Universität<br>Medizinische Klinik II<br>Hämatologie und Onkologie<br>Theodor-Stern-Kai 7<br>60590 Frankfurt/Main                        | Investigators:<br>Dr. Uta Brunnberg<br>Dr. Anne Köhler                                                    | Ethik-Kommission des Fachbereichs<br>Medizin der Johann Wolf-gang Goethe-<br>Universität Frankfurt<br>Theodor-Stern-Kai 7<br>60590 Frankfurt am Main |
| 5 | Universitätsklinikum Göttingen<br>Abteilung<br>Hämatologie/Onkologie,<br>Neurochirurgie<br>Robert-Koch-Str. 40<br>37075 Göttingen                                                | Investigators:<br>Dr. med. Friederike Braulke<br>Dr. med. Justin Hasenkamp                                | Ethik-Kommission der Medizinischen<br>Fakultät der<br>Georg-August-Universität<br>Von-Siebold-Straße 3<br>37075 Göttingen                            |
| 6 | Universitätsmedizin Greifswald<br>Klinik und Poliklinik für Innere<br>Medizin C<br>Hämatologie, Onkologie und<br>Transplantationszentrum<br>Sauerbruchstraße<br>17475 Greifswald | Investigators:<br>Prof. Dr. Christian A.Schmidt<br>Dr. Carsten Hirt                                       | Ethikkommission an der<br>Universitätsmedizin Greifswald<br>Institut für Pharmakologie<br>Felix-Hausdorff-Str.3<br>17487 Greifswald                  |
| 7 | Universitätskrankenhaus<br>Hamburg-Eppendorf<br>Medizinische Klinik II<br>Onkologisches Zentrum<br>Martinistr. 52<br>20246 Hamburg                                               | Investigators:<br>Prof. Dr. Mascha Binder<br>Dr. Winfried Alsdorf                                         | Ethik-Kommission der Ärztekammer<br>Hamburg<br>Weidestraße 122 b<br>22083 Hamburg                                                                    |
| 8 | Universitätsklinik Heidelberg<br>Medizinische Klinik V<br>Im Neuenheimer Feld 410<br>69120 Heidelberg                                                                            | Investigators:<br>Prof. Dr. Gerlinde Egerer<br>Dr. Sascha Dietrich                                        | Ethik-Kommission I<br>der Medizinischen Fakultät Heidelberg<br>Alte Glockengießerei 11/1<br>69115 Heidelberg                                         |
| 9 | Universitätsklinikum Köln<br>Innere Medizin 1<br>Kerpenerstr. 62<br>50937 Köln                                                                                                   | Investigators:<br>Prof. Dr. Peter Borchmann<br>PD Dr. Bastian von Tresckow<br>Prof. Dr. Arnim Tuchscherer | Ethik-Kommission der Medizinischen<br>Fakultät der Universität zu Köln<br>Gebäude 5, Kerpener Str.62<br>50937 Köln                                   |

**MARTA Trial:**  
**DRKS-No. 00011932**  
**EudraCT-Number: 2016-001628-72**  
**Sites and Ethic-Committees**

|    |                                                                                                                                                                                  |                                                                                                                  |                                                                                                                                           |
|----|----------------------------------------------------------------------------------------------------------------------------------------------------------------------------------|------------------------------------------------------------------------------------------------------------------|-------------------------------------------------------------------------------------------------------------------------------------------|
| 10 | Universitätsklinikum Schleswig-Holstein, Campus Kiel<br>Klinik für Innere Medizin II<br>Hämatologie und Internistische Onkologie<br>Arnold-Heller-Str. 3 (Haus 50)<br>24105 Kiel | Investigators:<br>Prof. Dr. Christiane Pott<br>Dr. Dominique Wellnitz                                            | Ethik-Kommission der Medizinischen Fakultät der Christian-Albrechts-Universität zu Kiel<br>Arnold-Heller-Straße 3<br>Haus 9<br>24105 Kiel |
| 11 | Klinikum Stuttgart<br>Klinik für Hämatologie, Onkologie und Palliativmedizin<br>Stuttgart Cancer Center /<br>Tumorzentrum Eva Mayr-Stihl<br>Kriegsbergstr. 60<br>70174 Stuttgart | Delegate coordinating principal investigator:<br>Prof. Dr. Gerald Illerhaus<br>Delegate:<br>Dr. Kristina Mikesch | Ethik-Kommission bei der Landesärztekammer Baden-Württemberg<br>Jahnstraße 40<br>70597 Stuttgart                                          |
| 12 | Universitätsklinikum Tübingen<br>Medizinische Klinik II<br>Otfried-Müller-Str. 10<br>72076 Tübingen                                                                              | Investigators:<br>Prof. Dr. Robert Möhle<br>Dr. Martin Sökler                                                    | Ethik-Kommission der Medizinischen Fakultät und am Universitätsklinikum Tübingen<br>Gartenstraße 47<br>72074 Tübingen                     |
